1 Running head: Bias in CWM analysis

2 **Bias in community-weighted mean analysis relating species attributes to**  
3 **sample attributes: justification and remedy**

4 David Zelený

5 Institute of Ecology and Evolutionary Biology, National Taiwan University, No. 1, Sec. 4,  
6 Roosevelt Rd., Taipei 10617, Taiwan

7 email: [zeleny@ntu.edu.tw](mailto:zeleny@ntu.edu.tw)

8

9 **# Words: 8966**

10 **# References: 40**

11

12 **Abstract**

13 One way to analyze the relationship between species attributes (e.g. functional traits) and sample  
14 attributes (e.g. environmental variables) via the matrix of species composition is by calculating  
15 the community-weighted mean of species attributes (CWM) and relating it to sample attributes  
16 by correlation, regression, ANOVA etc. This weighted-mean approach is used in a number of  
17 ecological fields (e.g. functional and vegetation ecology, biogeography, hydrobiology or  
18 paleolimnology), and represents an alternative to other methods used to relate species and sample  
19 attributes via the species composition matrix such as the fourth-corner approach.

20           The problem with the weighted-mean approach is that in certain cases it yields biased  
21 results in terms of both effect size and significance, and this bias is contingent upon the beta  
22 diversity of the species composition matrix. The reason is that CWM values calculated from  
23 samples of communities sharing some species are not independent from each other. This lack of  
24 independence influences the number of effective degrees of freedom, which is usually lower than  
25 the actual number of samples, and the difference further increases with decreasing beta diversity  
26 of the data set. Discrepancy between the number of effective degrees of freedom and the number  
27 of samples in analysis turns into biased effect sizes and an inflated Type I error rate in those  
28 cases where the significance of the relationship is tested by standard tests, a problem which is  
29 analogous to analysis of two spatially autocorrelated variables. Consequently, reported results of  
30 studies using rather homogeneous (although not necessarily small) compositional data sets may  
31 be overly optimistic, and results of studies based on data sets differing by their beta diversity are  
32 not directly comparable.

33           Here, I introduce guidelines on how to decide in which situation the bias is actually a  
34 problem when interpreting results, recognizing that there are several types of species and sample  
35 attributes with different properties and that ecological hypotheses commonly tested by the  
36 weighted-mean approach fall into one of three broad categories. I also compare available  
37 analytical solutions accounting for the bias (namely modified permutation test and sequential  
38 permutation test using the fourth-corner statistic) and suggest rules for their use.

39

40 **Key Words:** degrees of freedom; fourth-corner approach; functional traits; modified permutation  
41 test; sequential permutation test; species indicator values

## 42 **Introduction**

43 *Weighted-mean approach* is a method to analyze the relationship between species attributes and  
44 sample attributes by calculating community-weighted means of species attributes (CWM), which  
45 can be directly related to sample attributes by correlation, regression, ANOVA or other methods.  
46 *Species attributes* are species properties (traits), behavior (species ecological optima) or  
47 phylogenetic age, while *sample attributes* are characteristics of community samples measured in  
48 the field (environmental variables) or derived from a matrix of species composition (like species  
49 richness or positions of samples in ordination diagrams).

50         The weighted-mean approach is used in a wide range of ecological fields. In functional  
51 ecology, testing the effect of environmental variables on changes in CWM is one of the  
52 approaches that demonstrates the effect of environmental filtering on trait-mediated community  
53 assembly (Díaz et al. 1998; Shipley 2010). Similarly, CWM is used to predict changes in  
54 ecosystem properties, such as biomass production or nutrient cycling (Garnier et al. 2004; Vile et  
55 al. 2006), or ecosystem services like fodder production or maintenance of soil fertility (Díaz et al.  
56 2007). In biogeography, grid-based means of species properties (such as animal body size, range  
57 size or evolutionary age) are linked to macroclimate or diversity (Hawkins and Diniz-Filho  
58 2006). Vegetation ecologists use species indicator values (e.g. those of Ellenberg et al. 1992) to  
59 estimate habitat conditions from calculated mean species indicator values of vegetation samples  
60 and relate them to soil, light or climatic variables (Schaffers and Sýkora 2000). In hydrobiology,  
61 reliability of the saprobic index of Sládeček (1973) based on weighted mean of diatom indicator  
62 values, or similar indices (e.g. trophic diatom index, Kelly and Whitton 1995) is evaluated by  
63 relating them to measured water quality parameters. Similarly, in paleoecology the method used

64 to reconstruct acidification of lakes from fossil diatom assemblages preserved in lake sediments  
65 is based on weighted means of diatom optima along the pH gradient (ter Braak and Barendregt  
66 1986), and as one of the transfer functions (e.g. Birks et al. 1990) is considered to be a tool  
67 which has “revolutionised paleolimnology” (Juggins 2013). Other, more specific examples  
68 include relating the community specialization index (mean of species specialization values  
69 weighted by their dominance in the community) to environmental variables (Clavero and  
70 Brotons 2010, Carboni et al. 2016), or attempts to verify whether plant biomass can be estimated  
71 from tabulated plant heights and species composition as the mean of species heights weighted by  
72 their cover in a plot (Axmanová et al. 2012).

73         Although the weighted-mean approach technically relates two sets of variables (CWM  
74 and sample attributes), three matrices are in fact involved in the computation background  
75 (notation here follows the RLQ analysis of Dolédec et al. 1996): matrix of *sample attributes* **R**  
76 with  $m$  sample attributes of  $n$  samples ( $n \times m$ ); matrix of *species composition* **L** with abundance  
77 (or presence-absence) of  $p$  species in  $n$  samples ( $n \times p$ ); and matrix of *species attributes* **Q** with  $s$   
78 species attributes for  $p$  species ( $s \times p$ ). The weighted-mean approach is just one of the possible  
79 options for relating species attributes (**Q**) to sample attributes (**R**) via a matrix of species  
80 composition (**L**): it combines **Q** with **L** into a matrix of weighted-means **M** and relates it to **R**.  
81 An alternative solution, although rarely used, is to combine a matrix of sample attributes **R** with  
82 species composition **L** by calculating the weighted-mean of sample attributes (optima of  
83 individual species along a given sample attribute or species centroids) and relate these values to  
84 species attributes **Q** (e.g. ter Braak and Looman 1986). A third option is to use methods suitable  
85 for simultaneously handling all three matrices (**R**, **L** and **Q**), such as the *fourth-corner approach*

86 (Legendre et al. 1997), the related ordination method, called RLQ analysis (Dolédec et al. 1996),  
87 and other alternatives (Jamil et al. 2013, Brown et al. 2014).

88         In the weighted-mean approach, the relationship between CWM and sample attributes,  
89 analyzed by correlation/regression/ANOVA, is often tested by a standard parametric or  
90 permutation test (called simply *standard test* throughout this study). However, not all types of  
91 ecological questions, which are usually solved by the weighted-mean approach, should actually  
92 be tested by standard test. In certain situations and types of null hypotheses, the weighted-mean  
93 approach combined with standard tests generates biased results, which are more optimistic than  
94 would be actually warranted by analyzed data. This bias includes unreliable estimates of effect  
95 size (e.g. correlation coefficients in the case of correlation, or  $r^2$  in the case of linear regression)  
96 and an inflated Type I error rate, leading to more frequent rejection of the null hypothesis than  
97 would be expected. The key point before applying the weighted-mean approach is to explicitly  
98 decide what is actually the relationship between species attributes or sample attributes and  
99 species composition, and which of these relationships is actually fixed and which is random  
100 (more on the terms “fixed” and “random” below). This decision should be based on critical  
101 inspection of the context of the study question and tested null hypothesis. Inspiration for this  
102 issue can be seen in the application of the fourth-corner approach (Legendre et al. 1997), for  
103 which Dray and Legendre (2008) demonstrated the problem of deciding on the right permutation  
104 test (from five permutation models) to test the actual question in hand, with a risk of inflated  
105 Type I error rate in the case of a wrong choice. For the weighted-mean approach, this issue was  
106 highlighted by Zelený and Schaffers (2012) in a specific context of relating mean Ellenberg  
107 indicator values (species attributes) to sample attributes derived from species composition matrix

108 (like ordination scores or species richness), and by Peres-Neto et al. (2012, 2016) in the context  
109 of metacommunity phylogenetics and species functional traits. These studies also proposed  
110 numerical solutions: Zelený and Schaffers (2012) introduced a *modified permutation test*, an  
111 alternative to the standard permutation test between CWM and sample attributes in which  
112 species rather than sample attributes are permuted, and Peres-Neto et al. (2012, 2016) suggested  
113 employing the *sequential test* (ter Braak et al. 2012), using the *fourth-corner* statistic (Legendre  
114 et al. 1997). Additionally, Šmilauer and Lepš (2014, p. 158) mentioned this issue in the context  
115 of the CWM-RDA method (Kleyer et al. 2012).

116 Here, I first define several types of species or sample attributes, differing by their origin  
117 and relationship to a matrix of species composition. Then I review categories of questions and  
118 null hypotheses that are commonly analyzed by the weighted-mean approach. I use simulated  
119 data to show for which of these categories there is a risk of biased results if tested by standard  
120 test and how this bias depends on the beta diversity of a compositional data set. I argue that the  
121 bias is caused by a mismatch between the number of samples in the weighted-mean analysis and  
122 the actual number of effective degrees of freedom, since community samples sharing some of the  
123 species with other samples do not count for the full degree of freedom in this analysis. Note that  
124 for numerical simplicity, I ignore intraspecific variation in species attributes. Finally, I review  
125 and compare methods available for solving the problem of inflated Type I error rate in the  
126 weighted-mean approach, namely the *modified permutation test* (Zelený and Schaffers 2012) and  
127 the *sequential permutation test* based on the *fourth-corner statistic* (Peres-Neto et al. 2012, 2016),  
128 and suggest guidelines for their use. Although the examples, ecological interpretations and  
129 reasoning used here are focused on the relationship of species functional traits or species

130 indicator values with sample attributes analyzed by the weighted-mean approach, the general  
131 context is also valid for other types of species and sample attributes linked by the weighted-mean  
132 approach.

133

#### 134 **Types of species and sample attributes**

135 When considering alternative types of questions commonly analyzed by the weighted-mean  
136 approach, it proves useful to distinguish whether species and sample attributes are *fixed* or  
137 *random*, and *internal* or *external*. The distinction between *fixed* and *random* attributes depends  
138 on whether they are specific for a given data set and this specificity is acknowledged by the  
139 question/hypothesis being tested (this link is deemed as given, and not further questioned or  
140 tested). Fixed attributes are specific and acknowledged, while random attributes represent a  
141 subset of some larger pool of values and their link to species composition is not acknowledged  
142 by the hypothesis being tested. In the narrow sense of permutation tests, fixed attributes should  
143 not be permuted among each other, while random attributes can be. For interpretation, the effect  
144 of fixed attributes is limited only to a given set of attribute values and in the context of  
145 community data sets included in the analysis and cannot be generalized beyond, while the effect  
146 of random attributes can be interpreted more broadly and also beyond the data set used in the  
147 study.

148         The main difference between *internal* and *external* attributes is their origin. *Internal*  
149 attributes are numerically derived from a matrix of species composition, while *external* attributes  
150 are typically measured or estimated variables, not directly derived from a species composition  
151 matrix. *Internal species* attributes are, for example, species optima calculated as the weighted-

152 means of sample attributes or as species scores on ordination axes, and similarly *internal sample*  
153 attributes are sample scores on ordination axes, species richness of individual samples or the  
154 assignment of samples into groups based on compositional similarity (e.g. by numerical  
155 classification). *External species* attributes, on the other hand, are measured traits or tabulated  
156 species indicator values, and *external sample* attributes are measured or estimated environmental  
157 variables or experimental treatments. While the link of external species or sample attributes to  
158 species composition may be fixed or random and depends on the context, internal attributes are  
159 always fixed, since they refer only to the context of the data set from which they have been  
160 derived and their randomization would make no sense.

161       To give a few examples: species traits measured on individuals from plots of given  
162 community data sets can be considered as fixed and external, while species traits taken from  
163 large trait databases and measured often in a completely different context should be considered  
164 as random and external. Sample ordination scores derived from a matrix of species composition  
165 are fixed and internal sample attributes, while environmental variables measured in the field or  
166 derived from GIS layers may be considered as random and external. Indeed, the distinction  
167 between *fixed* and *random* is often arbitrary and depends on the authors' decision and the  
168 theoretical context of the study, and the same variables can be seen as fixed or random in  
169 different contexts. For example, if results are expected to have local validity (e.g. whether the  
170 CWM of species height in a given agricultural system can predict the harvested biomass),  
171 species attributes can be seen as fixed; if the species height will be measured again in the same  
172 community, results will be similar, but not generally applicable to other communities. If the aim  
173 is to generalize results (e.g. to assess whether the species height itself, as tabulated in the national



174 floras, can be used as a tool to predict biomass yield), species attributes should be treated as  
175 random and the analysis should be modified accordingly, so that even a local study can  
176 contribute to a more general description of this relationship.

177         In the original description of the fourth-corner problem (Legendre et al. 1997), both  
178 species and sample attributes were considered as fixed, while the matrix of species composition  
179 was considered as random, and different permutation models were applied to test alternative  
180 hypotheses. In the weighted-mean approach, the decision as to whether attributes are fixed or  
181 random also influences the choice of a meaningful way to test the relationship, and is therefore  
182 crucial in the selection of the correct statistical test. All hypotheses (as discussed further) make  
183 an implicit or explicit assumption that either species or sample attributes are fixed, with a link to  
184 species composition acknowledged *a priori* and not further questioned (and also not tested).

185

### 186 **Types of hypotheses tested by weighted-mean approach**

187 Considering the distinction between fixed and random (sample or species) attributes, questions  
188 and hypotheses commonly tested by the weighted-mean approach fall into one of the three  
189 categories (see Table 1 for summary). *Category A* assumes that while sample attributes are fixed,  
190 species attributes are random; *category B* is opposite to the previous category, with sample  
191 attributes considered random and species attributes fixed; and, finally, *category C* assumes that  
192 both species and sample attributes are random. Below, I review in detail individual categories,  
193 with examples of ecological questions/hypotheses for each of them.

194 *Category A – species attributes are random, sample attributes are fixed*

195 Hypotheses in this category explicitly acknowledge the link between sample attributes and  
196 species composition, or the link is implicit from the context or numerical background of the  
197 study. The null hypothesis states that species attributes are not linked to species composition,  
198 while the alternative hypothesis states that they are. Questions focused on relating CWM to  
199 internal sample attributes (i.e. those derived numerically from the matrix of species composition)  
200 fall into this category (e.g. relating mean Ellenberg indicator values to sample scores in  
201 unconstrained ordination to interpret the ecological meaning of ordination axes; Zelený and  
202 Schaffers 2012). In addition, studies with external sample attributes considered to be fixed, such  
203 as experimental treatments, fall into this category in the case when their effect on species  
204 composition is acknowledged, and the question is about how species attributes respond to it. An  
205 additional level of complexity is added in studies dealing with grid data where both CWM and  
206 internal sample attributes (e.g. species richness derived from community data) are spatially  
207 autocorrelated due to the spatial coherence of species distribution (B. Hawkins, *pers. comm.*).  
208 Zelený and Schaffers (2012) showed that standard tests have inflated the Type I error rate for this  
209 category of hypotheses, and as an alternative introduced the *modified permutation test*,  
210 permuting species attributes instead of sample attributes, as further discussed in this study.

211 *Category B – species attributes are fixed, sample attributes are random*

212 Hypotheses in the second category explicitly assume that the species attributes are linked to  
213 species composition. The null hypothesis states that sample attributes are not linked to species  
214 composition, while the alternative hypothesis states that they are. Examples are trait-based  
215 studies asking whether species traits can explain the effect of environmental filtering on species  
216 abundance in a community. These studies operate with an assumption that species traits (as

217 species attributes) are functional, i.e. they influence the abundance of species in a community,  
218 and the question being evaluated is whether the sample attributes (environmental factor) act as an  
219 environmental filter on species abundance. Descriptive studies without ambitions to be more  
220 generalized also fall into this category – e.g. the relationship between the CWM of species  
221 indicator values (e.g. mean Ellenberg indicator values) and measured environmental variables, if  
222 the interpretation is restricted only for the community data set included in the study. Finally,  
223 studies using internal species attributes (derived from species composition, e.g. as the weighted-  
224 mean of sample attributes or as scores on ordination axes) also belong to this category.

225 *Category C – both species and sample attributes are random*

226 This category of hypotheses includes mostly observational studies without prior knowledge or  
227 expectations about a link between any of the matrices. The null hypothesis states that there is no  
228 link between species and sample attributes via the matrix of species composition because either  
229 the species attributes or the sample attributes (or both) are not linked to the matrix of species  
230 composition. To reject this null hypothesis means to prove that both species and sample  
231 attributes are actually linked to species composition. Empirical studies describing the general  
232 relationship between sample attributes and species attributes, without explicitly or implicitly  
233 acknowledging some underlying assumptions or mechanisms, belong to this category. Examples  
234 are studies relating the CWM of functional traits to environmental variables without a clear  
235 assumption that traits are functional, allowing to question whether particular traits are actually  
236 linked to species composition or not. In the case of studies with species indicator values, these  
237 include relating mean indicator values to environmental variables with the aim of generalizing  
238 the result also beyond the scope of the studied community data set (e.g. answering the question

239 of whether Ellenberg indicator values for soil reaction *per se* are good predictors of measured  
240 soil pH, i.e. not only in the context of a given community data set).

241

## 242 **Illustration of the bias and its dependence on beta diversity**

243 If hypotheses from categories A and C are tested by the weighted-mean approach based on  
244 correlation or regression and combined with the standard test, results may be highly biased, both  
245 in terms of the estimated model parameters and the inflated Type I error rate (Zelený and  
246 Schaffers 2012, Peres-Neto et al. 2016), and the magnitude of the bias changes with the beta  
247 diversity of the compositional data set. I will illustrate this bias using simulated community data,  
248 in which the set of communities with increasing beta diversity will be generated and  
249 accompanied by matrices of species and sample attributes related (or not) to species composition  
250 (creating four scenarios relevant to hypotheses in categories A, B and C). The same simulated  
251 data set will be later used to demonstrate the performance of available statistical solutions.

### 252 *Description of 2D simulated community data set*

253 Each simulated community data set includes the set of three matrices (sample attributes **R**,  
254 species composition **L**, and species attributes **Q**), with the link between species or sample  
255 attributes and species composition (or both) broken by the permutation of attributes. This creates  
256 four scenarios (Fig. 1, identical with scenarios 1–4 of Dray and Legendre 2008): 1) both sample  
257 and species attributes linked to species composition; 2) sample attributes linked to species  
258 composition, species attributes not; 3) species attributes linked to species composition, sample  
259 attributes not; 4) none of species or sample attributes linked to species composition. For

260 hypotheses in category A defined above, scenario 2 represents the null hypothesis, for category B  
261 scenario 3 is the null hypothesis, and for category C the scenarios 2, 3 and 4 represent alternative  
262 states of null hypothesis (Table 1). Scenario 1 represents the power test for all three categories  
263 (i.e. it measures the probability of getting significant results if the alternative hypothesis is true).

264         Additionally, I also examined how observed bias depends on the beta diversity of the  
265 species composition matrix, which influences the number of effective degrees of freedom in  
266 analysis (as explained in detail in the section *Justification of the bias*). An algorithm generating  
267 community data is structured by two virtual ecological gradients, and will be called *2D simulated*  
268 *community data set* throughout this paper (this is an extension of the original one-gradient  
269 algorithm of Fridley et al. 2007). The first gradient has *constant* length for all generated data sets  
270 and serves as a surrogate for the measured environmental variable; in the analysis, positions of  
271 samples along this gradient are used as *sample attributes*, while the simulated species optima  
272 along this gradient are used as *species attributes*. The length of the second gradient is *variable*,  
273 and increasing its length increased the beta diversity of the data set (Appendix S1: Table S1 and  
274 Fig. S1). The length of the first gradient was arbitrarily set to 1000 units and the range of species  
275 niche widths was between 500 and 1000 units. The length of the second gradient varied between  
276 1000 to 10 000 units; for simplicity, here I assume that 1000 units of the second gradient  
277 represents one community, i.e. enlarging the second gradient from 1000 to 10 000 units (by steps  
278 of 1000 units) generates a set of data sets with 1 to 10 communities. Community samples were  
279 created by randomly choosing locations along the first and second gradient, and the species  
280 composition for each sample was derived by the random assignment of a fixed number of

281 individuals to species identities weighted by the relative abundance of species with non-zero  
282 probability of occurrence at a given location of the gradient (see Appendix S1 for further details).

283 Note that the model generating the 2D simulated community data is different from the  
284 one generating the simulated data sets used by Dray and Legendre (2008) and Peres-Neto et al.  
285 (2016), which used only one environmental gradient and generated rather homogeneous  
286 communities (Appendix S1: Table S1 vs Appendix S4: Table S2). The other difference is how  
287 each algorithm achieves the increase in beta diversity: while in the 2D simulated data set this is  
288 done by prolonging the second virtual gradient (which increases gamma diversity while keeping  
289 the mean alpha diversity rather constant), in the 1D simulated data set of Dray and Legendre  
290 (2008) the beta diversity is increased by narrowing the niche breadth of individual species  
291 (keeping the gamma diversity of the data set constant but decreasing the mean alpha diversity).  
292 For comparison with other published studies, all analyses were also repeated with the 1D  
293 simulated community data generated according to Dray and Legendre (2008), with results  
294 available in Appendix S4.

295 All analyses were conducted using R-project (v. 3.3.1, R Core Team 2015); complete R  
296 scripts are available in Data S1 and all functions are in R-packages *weimea* (abbreviation for  
297 *weighted mean*; source code of v. 0.60 in Data S2).

#### 298 *Weighted-mean approach with standard test applied on simulated data*

299 For each of the four scenarios (1–4) I created ten levels of beta diversity, and for each  
300 combination of *scenario*  $\times$  *level of beta diversity* I created 1000 datasets (4 scenarios  $\times$  10 levels  
301 of beta diversity  $\times$  1000 replications = 40 000 data sets). For each data set I calculated the CWM

302 of species attributes, related it to sample attributes using Pearson's  $r$  correlation and tested its  
303 significance using the parametric  $t$ -test (for additional results for least-square regression and  $r^2$   
304 see Appendix S2: Fig. S1). For each level of community beta diversity in each scenario, I  
305 counted the proportion of correlations significant at  $\alpha = 0.05$  (note that this proportion is  
306 identical to the proportion of significant regressions).

307 From the three scenarios with no direct link between species and sample attributes  
308 (scenarios 2, 3 and 4), analysis of data generated by scenario 2 reveals the bias – the correlation  
309 coefficient deviates from zero more than in other cases (Fig. 2), and the test of significance  
310 shows an inflated Type I error rate (Fig. 3). This bias decreases with increasing beta diversity of  
311 the species composition matrix (Fig. 2 & 3, Scenario 2): for the most homogeneous data set  
312 (*level of beta diversity* = 1), the range of Pearson's  $r$  correlation coefficients (expressed as 2.5%  
313 and 97.5% quantiles) is between -0.751 and 0.751, with 60% of correlations significant, while  
314 for the most heterogeneous data set with a high beta diversity (*level of beta diversity* = 10) the  
315 range of Pearson's  $r$  values is between -0.381 and 0.354, with 15% of correlations significant  
316 (compared to 2.5 and 97.5% quantile range values of  $r$  observed in scenarios 3 and 4 being on  
317 average between -0.278 and 0.281, with the expected number of significant results being close to  
318 5%). Similarly inflated are the values of coefficient of determination ( $r^2$ ; Appendix S2: Fig. S1,  
319 Scenario 2) calculated by least-square linear regression. Applying the standard test on the  
320 simulated community data set of Dray and Legendre (2008) shows analogously biased results  
321 (Appendix S4: Table S1 and Fig. S2).

322

323 **Justification of the bias**

324 Since the CWM of species attributes are calculated from species attributes assigned to individual  
325 species and from species composition of individual samples, they inherit some information from  
326 both sources. The numerical difference between the calculated CWM values of two community  
327 samples is necessarily constrained by a difference in these samples' species composition: two  
328 samples with identical species composition (or identical relative species abundances) have  
329 identical calculated weighted-means, and two samples with slightly different species  
330 composition will have CWM values rather similar. Non-independence of CWM values has  
331 consequences for the analysis with sample attributes, if these are themselves in some way related  
332 to species composition. Two values of the CWM calculated from community samples sharing  
333 some species do not bring two independent degrees of freedom into analysis, because samples  
334 used for their calculation are not independent and the difference in their CWM is predictable (to  
335 some extent) from the difference in their species composition. This problem scales up to the data  
336 set level: in case of two compositional data sets with the same number of samples used in the  
337 weighted-mean approach, the data set that is compositionally more homogeneous has a lower  
338 number of effective degrees of freedom compared to the more heterogeneous one.

339 If CWM values are calculated from species composition data in which some samples  
340 share some species, and at the same time sample attributes are (in some way) related to species  
341 composition, analysis of the CWM with sample attributes resembles the analysis of two spatially  
342 autocorrelated variables. Samples of spatially autocorrelated variables located nearby in  
343 geographical space have more similar values than expected if the values are randomly selected  
344 and are therefore not statistically independent (Legendre and Legendre 2012). A new observation  
345 does not bring completely new information, because its value can be partly derived from the



346 value observed in a nearby site, and the effective number of samples (i.e. the effective number of  
347 degrees of freedom) is lower than the real number of samples. Since for standard parametric tests  
348 the number of degrees of freedom is important for choosing the correct statistical distribution for  
349 a given sample size, disparity between the real number and effective number of samples leads to  
350 the selection of narrower confidence intervals and hence a higher probability of obtaining  
351 significant results (Bivand 1980, Legendre 1993).

352         In the case of the weighted-mean approach, it is not the proximity in a geographical space,  
353 but the proximity in a compositional space, which reflects distances between samples expressed  
354 as their compositional dissimilarity. The bias is not present if one or both of the variables (CWM  
355 and sample attributes) are not autocorrelated in the compositional space. This happens if either  
356 sample attributes are not related to the species composition matrix, or in the improbable case of a  
357 species composition matrix having so high a beta diversity that individual samples do not share  
358 any species and calculated CWM values are therefore not related to species composition. In case  
359 of spatially autocorrelated variables this is analogous to the situation where only one or none of  
360 the variable are spatially autocorrelated, in which case the bias caused by autocorrelation does  
361 not appear.

362         The bias in the community-weighted mean approach is therefore limited to cases where  
363 species composition of samples is at least partly overlapping and sample attributes are linked to  
364 species composition (i.e. they are fixed). This is true for all *internal* sample attributes derived  
365 from the matrix of species composition, since they are linked to the matrix of species  
366 composition due to their numerical origin, and also for some of *external* sample attributes, if

367 these are considered to be fixed (for examples see section *Types of species and sample*  
368 *attributes*).

369 The dissimilarity in species composition of two samples directly related to the difference  
370 in their CWM values can be quantified by Whittaker's index of association (Whittaker 1952, in  
371 Legendre and Legendre 2012 as  $D_9$ ), which can be numerically derived from differences between  
372 two calculated CWM values (see proof in Appendix S3). The single value of beta diversity for a  
373 given data set can be obtained using the beta diversity metric of Legendre and De Cáceres (2013),  
374 also calculated from the symmetric matrix of dissimilarities (measured by Whittaker's index of  
375 association) among all pairs of samples. This beta diversity metric is not dependent on the size of  
376 the data set, and the underlying Whittaker's index of association is directly related to the  
377 weighted-mean approach.

378

### 379 **Available solutions and their comparison**

380 To my knowledge two approaches have been introduced that attempt to solve the bias in the  
381 weighted-mean approach, namely the *modified permutation test* introduced (in the context of the  
382 CWM of species indicator values) by Zelený and Schaffers (2012), and the *sequential*  
383 *permutation test* using the *fourth-corner statistic*, introduced first in the electronic appendix of  
384 Peres-Neto et al. (2012, Appendix A) and later in a more elaborated version in Peres-Neto et al.  
385 (2016). Here I review the strengths and weaknesses of both approaches, test their performance  
386 using simulated community data and suggest guidelines for their use. Both a 2D simulation  
387 community data set and a 1D simulated data set according to Dray and Legendre (2008) have  
388 been used, with results of the former reported in the main paper and the latter in Appendix S4.

389 Note that hypotheses in category B are not prone to bias if the weighted-mean approach with  
390 standard test is used, and reviewed solutions are therefore relevant only for categories A and C.

391 *Modified permutation test: comparison with the results of a null model*

392 Comparison with results of a null model is analogous to testing the relationship between  
393 autocorrelated variables using toroidal shift, when one variable is permuted in a way that it  
394 preserves the original degree of spatial autocorrelation (Fortin and Dale 2005). Alternatively, one  
395 can generate random variables with the same degree of spatial autocorrelation as that of the  
396 original variable (Deblauwe et al. 2012). In the case of weighted-mean analysis with variables  
397 autocorrelated in the compositional space, such variables can be generated by calculating the  
398 CWM from randomized (or randomly generated) species attributes ( $CWM_{rand}$ ).  $CWM_{rand}$  inherits  
399 the same level of compositional autocorrelation as those of the CWM values of the real species  
400 attributes ( $CWM_{obs}$ ), because they are calculated by the same algorithm from the same species  
401 composition matrix. One can generate the null distribution of a test statistic (like  $t$ -value for  
402 correlation or  $F$ -value for regression) by repeated calculation of  $CWM_{rand}$  each time with newly  
403 randomized (or newly generated) species attribute values, and compare the observed statistic  
404 (relating  $CWM_{obs}$  to sample attributes) to this null distribution. This is identical to the *modified*  
405 *permutation test*, introduced to test the relationship between the CWM of species attributes with  
406 sample attributes by Zelený and Schaffers (2012) in the context of relating the CWM of species  
407 indicator values (e.g. those tabulated in Ellenberg et al. 1992) with internal variables (e.g. species  
408 richness or ordination scores based on the same species composition data set).

409 I illustrated the behavior of the *modified permutation test* using the 2D simulated  
410 community data sets. I calculated the correlation of the CWM of species attributes with sample

411 attributes for all four scenarios in communities of increasing beta diversity, and tested the  
412 significance of this correlation using the modified permutation test. Results show that in contrast  
413 to the standard permutation test, the originally inflated Type I error rate in the case of scenario 2  
414 disappears (Fig. 4). At the same time, in the case of scenario 3 the test is slightly conservative for  
415 homogeneous data sets. The same conclusion applies if the modified permutation test is used on  
416 Dray and Legendre's simulated community data set, in which the results for scenario 3 are even  
417 more conservative (almost no significant correlations, Appendix S4: Table S1 and Fig. S2a),  
418 since the community data set has rather low beta diversity (Appendix S4: Table S2). Additional  
419 detail power analysis on the simulated community data set with added random noise reveals that  
420 the modified permutation test loses power when both sample size and species number decrease  
421 (Appendix S4: Fig. S1a), and also with a decrease in the beta diversity of the data set (due to  
422 increased species tolerance, Appendix S4: Fig S1b).

423         The modified permutation test is suitable for testing hypotheses in category A, which  
424 assume that species attributes are random, while sample attributes are fixed (linked to species  
425 composition) and for which scenario 2 is relevant for testing the null hypothesis. It should,  
426 however, not be used for testing the hypotheses in the category B and C, since for both  
427 categories is relevant scenario 3 with fixed species attributes, which should not randomized  
428 (which is what modified permutation test is doing).

#### 429 *Sequential permutation test with the fourth-corner statistic*

430 Dray and Legendre (2008) noted that the fourth-corner statistic  $r$ , introduced by Legendre et al.  
431 (1997), is “equal to the slope of the linear model, weighted by total species abundance, with the  
432 niche centroids as the response variable and the species trait as the explanatory variable.” This

433 analogy was further elaborated by Peres-Neto et al. (2012, Appendix A) and Peres-Neto et al.  
434 (2016), who presented an algorithm for how to use the *fourth-corner* statistic  $r$  in the weighted-  
435 mean approach. In short, both  $\mathbf{R}$  and  $\mathbf{Q}$  matrices are first centered by the weighted mean of row  
436 sums of  $\mathbf{L}$  (in the case of  $\mathbf{R}$ ) and column sums of  $\mathbf{L}$  (in the case of  $\mathbf{Q}$ ), and then standardized.  
437 Then, the fourth-corner  $r$  statistic is the slope of weighted regression between the weighted mean  
438 of centered plus standardized  $\mathbf{Q}$  and centered plus standardized  $\mathbf{R}$ , weighted by row sums of  $\mathbf{L}$ .  
439 The main advantage of the fourth-corner statistic is the option to use the *sequential permutation*  
440 *test* introduced by ter Braak et al. (2012), which combines results of tests based on permuting  
441 sample attributes (model 2 in Legendre et al. 1997) and species attributes (model 4). If the first  
442 test is significant, then the second test is done, and overall significance of the result is equal to  
443 the higher of these two tests'  $P$ -values. When applied to the 2D simulated community data set,  
444 this test gives unbiased results for all scenarios (Appendix S2: Fig. S3), although being more  
445 conservative in the case of homogeneous data sets in scenario 4, which is relevant for questions  
446 in category C. Results calculated on the simulated data set of Dray and Legendre (2008) confirm  
447 this finding (Appendix S4: Table S1 and Fig. S2b). Power analysis (Appendix S4: Fig. S1c,d)  
448 reveals a performance very similar to that of the modified permutation test. The sequential test  
449 with the fourth-corner statistic is therefore suitable for testing hypotheses from all three  
450 categories, although in the case of category B it is not needed (standard permutation test gives  
451 unbiased results) and in the case of category C it is overly conservative for homogeneous  
452 community data sets (scenario 4 on Fig. 4). A disadvantage is that the sequential test with the  
453 fourth-corner statistic is restricted only to the weighted regression/correlation between centered  
454 and standardized species and sample attributes, weighted by row sums of a species composition  
455 matrix ( $\mathbf{L}$ ), and is therefore more like a special case of weighted-mean approach (which also

456 includes other methods such as non-weighted regression, correlation or ANOVA and does not  
457 require standardizing species and sample attributes).

458

## 459 **Discussion**

460 The main motivation of this study was to show that the results of the weighted-mean approach  
461 critically depend on the correct decision being made regarding the test used for statistical  
462 inference. To help in this decision process, I suggested that each hypothesis can be classified into  
463 one of the three categories, given the explicit (or implicit) assumptions about the role of species  
464 and sample attributes. For each category, I suggested an optimal strategy for testing the  
465 significance of the relationship between the CWM and sample attributes, summarized in Table 1.  
466 The choice of the appropriate category is not always straightforward. For example, trait studies  
467 testing whether an environment is filtering the species into a community via their functional  
468 traits routinely assume that such traits are functional, and in the weighted-mean approach are  
469 therefore considered as fixed (category B). However, this assumption may not always be  
470 justified; traits included in these analyses are often those readily available in databases and/or  
471 relatively easy to measure, but these do not necessarily need to be really the functional ones  
472 (Mlambo 2014). In case of compositionally relatively homogeneous data sets, even the traits  
473 with no ecological meaning may show a high and significant relationship to environmental  
474 variables if tested by standard tests. I believe that this calls for a revision of such commonly  
475 applied practice.

476 The analogy between the bias in the weighted-mean approach to the bias in the analysis  
477 of spatially autocorrelated variables suggests some other alternatives to reduce or remove the

478 bias. One is to stratify the data set to reduce redundancy in species composition among samples  
479 and increase the overall beta diversity of the compositional dataset, e.g. by removing one sample  
480 from pairs of samples with similar species composition. Although methods for stratification  
481 based on species composition are available (e.g. Lengyel et al. 2011), this potentially results in  
482 throwing out a large number of expensive data. Another option would be to apply some  
483 correction for effective degrees of freedom in analysis, analogous to a method estimating the  
484 effective number of samples in the case of autocorrelated variables (Dutilleul 1993), or to apply  
485 methods capable of dealing with autocorrelated residuals (analogy of geographically weighted  
486 regressions).

487         The analogy of the weighted-mean approach to the analysis of spatially autocorrelated  
488 variables also provides a solution to the question of how to deal with missing values for some of  
489 the species. Species with missing attribute values are not used for weighted-mean calculation, so  
490 they do not contribute to the compositional autocorrelation of CWM values. The point of the  
491 modified permutation test is to generate random variables with the same compositionally  
492 autocorrelated structure as the weighted mean calculated from the original species attributes. For  
493 this, the matrix of species composition, which inherits the compositional autocorrelation into  
494 weighted-mean values, should also remain the same for calculation of weighted means from  
495 randomly generated species attribute values. This would not be the case if the species with  
496 missing attribute values remains in both the composition and species attributes matrices, because  
497 permuting missing values would cause the weighted mean of permuted species attributes to be  
498 calculated every time with different species composition matrix (the species which in a given  
499 permutation run would be assigned missing values will not be included in this weighted-mean

500 calculation). The solution is to remove species with missing species attributes from both the  
501 species attributes and the species composition matrix, and in the case of the modified  
502 permutation test to permute only existing species attribute values. In the case where more species  
503 attributes are analyzed (e.g. three different functional traits) and the species has missing species  
504 attribute values for some attributes and not for others, the species should be removed from the  
505 species composition matrix only for the purpose of calculating and testing the weighted mean of  
506 that species' attributes for which the species value is missing, and not for the others. Although  
507 not explicitly mentioned in the studies describing the sequential test with the fourth-corner  $r$   
508 (Peres-Neto et al. 2012, 2016), I suggest that the same should also be done in the case of this  
509 approach.

510         The power test using the simulated data set showed that the power of both the modified  
511 permutation test and the sequential permutation test with the fourth-corner statistic decreases  
512 with a decrease in the number of species and/or number of samples. This makes these tests less  
513 suitable for smaller and relatively homogeneous data sets with few species (e.g. less than 40),  
514 since the probability of Type II error (i.e. not rejecting the null hypothesis, which is false)  
515 strongly increases. Additionally, in the case of a relatively homogeneous compositional data set  
516 the modified permutation test is overly conservative for scenario 3, while the sequential  
517 permutation test with the fourth-corner statistic is conservative for scenario 4. Both tests are  
518 therefore less suitable for testing hypotheses in category C in the case of a relatively  
519 homogeneous compositional data set.

520         In this study, I explicitly ignored intraspecific variation in species attributes, focusing  
521 only on the use of data set-wide mean species attribute values. Indeed, intraspecific variation



522 may be important; e.g. in the context of functional traits, the intraspecific variation gains  
523 increasing attention (Albert et al. 2012), and a relevant question is whether the inclusion of  
524 intraspecific variation (e.g. by including trait values that are sample-specific, not data set-wide)  
525 influences the potential bias reported in this study or not. This question requires further  
526 examination, which goes beyond this study, but in my opinion including another source of  
527 variation (species-level variation in species attributes) does not remove the problem of the bias  
528 itself, but makes the estimation of the bias and its correction more complex.

529         Finally, relevant consideration is whether the weighted-mean approach is actually the best  
530 analytical solution for the question being explored. In some cases, the question is explicitly  
531 focused on relating community-level values of species attributes, like mean Ellenberg indicator  
532 values (serving as an estimate of ecological conditions for individual sites) or the CWM of traits  
533 (as one of the functional-diversity metrics and as a community-level trait value), and the use of  
534 the weighted-mean approach is fully justified. Yet, in other cases, when the question is focused  
535 on relating individual species-attributes to sample attributes, the weighted-mean approach may  
536 not be the best analytical choice. The use of alternative options, such as the fourth-corner or RLQ  
537 analysis, for which the problem of inflated Type I error rate and choice of suitable permutation  
538 test have already been solved, can be a better solution.

539

## 540 **Conclusions**

541 In this study, I attempted to draw attention to the problem of the weighted-mean approach, which  
542 I believe is largely overlooked and generally not acknowledged, although it represents a source  
543 of potentially serious misinterpretations. Since in certain fields the weighted-mean approach is

544 gaining increasing momentum (e.g. in functional ecology with the CWM of species functional  
545 traits as one of the functional-diversity indices), I suggest that the time is ripe to critically assess  
546 in which situations and for which types of hypotheses the commonly used standard parametric or  
547 permutation tests are inappropriate, since they yield results that may be overly optimistic. I offer  
548 simple guidelines on how to decide whether, in a given context of a study, the standard  
549 methodology gives correct or biased results, and I review available solutions for those cases  
550 where it does not.

551

## 552 **Acknowledgements**

553 This study was supported by the Czech Science Foundation (P505/12/1022). My thanks go to  
554 Bill Shipley and Cajo ter Braak for critical comments as reviewers of the previous versions of  
555 this manuscript, which motivated me to heavily rework it, and also to Pedro Peres-Neto and  
556 Stephen Dray for discussion of differences between the modified permutation test solution and  
557 the fourth-corner one during the ISEC 2014 conference in Montpellier.

558

## 559 **Literature cited**

560 Albert, C. H., F. de Bello, S. Lavorel, and W. Thuiller. 2012. On the importance of intraspecific  
561 variability for the quantification of functional diversity. *Oikos* **121**:116–126.

562 Axmanová, I., et al. 2012. Estimation of herbaceous biomass from species composition and  
563 cover. *Applied Vegetation Science* **15**:580–589.

- 564 Birks, H. J. B., J.M. Line, S. Juggins, A. C. Stevenson, and C. J. F. ter Braak. 1990. Diatoms and  
565 pH reconstruction. *Philosophical Transactions of the Royal Society B Biological Sciences*  
566 **327**:263–278.
- 567 Bivand, R. 1980. A Monte Carlo study of correlation coefficient estimation with spatially  
568 autocorrelated observations. *Quaestiones Geographicae* **6**:5–10.
- 569 Brown, A. M., D. I. Warton, N. R. Andrew, M. Binns, G. Cassis, and G. Helois. 2014. The  
570 fourth-corner solution – using predictive models to understand how species traits interact with  
571 the environment. *Methods in Ecology and Evolution* **5**:344–352.
- 572 Carboni, M., D. Zelený, and A. Acosta. 2016. Measuring ecological specialization along a  
573 natural stress gradient using a set of complementary niche breadth indices. *Journal of Vegetation*  
574 *Science*, DOI: 10.1111/jvs.12413.
- 575 Clavero, M., and L. Brotons. 2010. Functional homogenization of bird communities along  
576 habitat gradients: accounting for niche multidimensionality. *Global Ecology and Biogeography*  
577 **19**:684–696.
- 578 Deblauwe, V., P. Kennel, and P. Coueron. 2012. Testing pairwise association between spatially  
579 autocorrelated variables: a new approach using surrogate lattice data. *PLOS One* **7**:e48766.
- 580 Díaz, S., M. Cabido, and F. Casanoves. 1998. Plant functional traits and environmental filters at  
581 a regional scale. *Journal of Vegetation Science* **9**:113–122.
- 582 Díaz, S., S. Lavorel, F. de Bello, F. Quétler, K. Grigulis, and T. M. Robson. 2007. Incorporating  
583 plant functional diversity effects in ecosystem service assessments. *Proceedings of the National*  
584 *Academy of Sciences USA* **104**:20684–20689.

- 585 Dolédec, S., D. Chessel, C. J. F. ter Braak, and S. Champely. 1996. Matching species traits to  
586 environmental variables: a new three-table ordination method. *Environmental and Ecological*  
587 *Statistics* **3**:143–166.
- 588 Dray, S., and P. Legendre. 2008. Testing the species traits-environment relationships: the fourth-  
589 corner problem revisited. *Ecology* **89** 3400–3412.
- 590 Dutilleul, P. 1993. Modifying the t test for assessing the correlation between two spatial  
591 processes. *Biometrics* **49**:305–314.
- 592 Ellenberg, H., H. E. Weber, R. Düll, V. Wirth, W. Werner, and D. Paulissen. 1992. Zeigerwerte  
593 von Pflanzen in Mitteleuropa. Second Edition. *Scripta Geobotanica* **18**:1–248.
- 594 Fortin, M.-J., and M. R. T. Dale. 2005. Spatial analysis. A guide for ecologists. Cambridge  
595 University Press, New York, USA.
- 596 Fridley, J. D., D. B. Vandermast, D. M. Kuppinger, M. Manthey, R. K. Peet. 2007. Co-  
597 occurrence based assessment of habitat generalists and specialists: a new approach for the  
598 measurement of niche width. *Journal of Ecology* **95**:707–722.
- 599 Garnier, E., et al. 2004. Plant functional markers capture ecosystem properties during secondary  
600 succession. *Ecology* **85**:2630–2637.
- 601 Hawkins, B. A., and J. A. F. Diniz-Filho. 2006. Beyond Rapoport's rule: evaluating range size  
602 patterns of New World birds in a two-dimensional framework. *Global Ecology and*  
603 *Biogeography* **15**:461–469.

- 604 Jamil, T., W. A. Ozinga, M. Kleyer, and C. J. F. ter Braak. 2013. Selecting traits that explain  
605 species-environment relationships: a generalized linear mixed model approach. *Journal of*  
606 *Vegetation Science* **24**:988–1000.
- 607 Juggins, S. 2013. Quantitative reconstructions in palaeolimnology: new paradigm or sick science?  
608 *Quaternary Science Reviews* **64**:20–32.
- 609 Kelly, M. G., and B. A. Whitton. 1995. Biological monitoring of eutrophication in rivers.  
610 *Hydrobiologia* **384**:55–67.
- 611 Kleyer, M., S. Dray, F. de Bello, J. Lepš, R. J. Pakeman, B. Strauss, W. Thuiller, and S. Lavorel.  
612 2012. Assessing species and community functional responses to environmental gradients: which  
613 multivariate methods? *Journal of Vegetation Science* **23**:805–821.
- 614 Legendre, P. 1993. Spatial autocorrelation: trouble or new paradigm? *Ecology* **74**:1659–1673.
- 615 Legendre, P., R. Galzin, and M. L. Harmelin-Vivien. 1997. Relating behavior to habitat:  
616 solutions to the fourth-corner problem. *Ecology* **78**:547–562.
- 617 Legendre, P, and L. Legendre. 2012. Numerical ecology, Third English Edition. Elsevier Science,  
618 Amsterdam, The Netherlands.
- 619 Legendre, P., and M. De Cáceres. 2013. Beta diversity as the variance of community data:  
620 dissimilarity coefficients and partitioning. *Ecology Letters* **16**:951–963.
- 621 Lengyel, A., M. Chytrý, and L. Tichý. 2001. Heterogeneity-constrained random resampling of  
622 phytosociological databases. *Journal of Vegetation Science* **22**:175–183.
- 623 Mlambo, M. C. 2014. Not all traits are ‘functional’: insights from taxonomy and biodiversity-  
624 ecosystem functioning research. *Biodiversity and Conservation* **23**:781–790.

- 625 Peres-Neto, P. R., M. A. Leibold, and S. Dray. 2012. Assessing the effects of spatial contingency  
626 and environmental filtering on metacommunity phylogenetics. *Ecology* **93**:S14–S30.
- 627 Peres-Neto, P. R., S. Dray, and C. J. F. ter Braak. 2016. Linking trait variation to the  
628 environment: critical issues with community-weighted mean correlation resolved by the fourth-  
629 corner approach. *Ecography*, 10.1111/ecog.02302
- 630 Schaffers, A. P., and K. V. Sýkora. 2000. Reliability of Ellenberg indicator values for moisture,  
631 nitrogen and soil reaction: comparison with field measurements. *Journal of Vegetation Science*  
632 **11**:225–244.
- 633 Shipley, B. 2010. From plant traits to vegetation structure. Chance and selection in the assembly  
634 of ecological communities. Cambridge University Press, Cambridge, UK.
- 635 Sládeček, V. 1973. System of water quality from the biological point of view. *Archiv für*  
636 *Hydrobiologie* **7**:1–218.
- 637 Šmilauer, P., and J. Lepš. 2014. Multivariate analysis of ecological data using CANOCO 5,  
638 Second Edition. Cambridge University Press, Cambridge, UK.
- 639 ter Braak, C. J. F., and L. G. Barendregt. 1986. Weighted averaging of species indicator values:  
640 its efficiency in environmental calibration. *Mathematical Biosciences* **78**:57–72.
- 641 ter Braak, C. J. F., and C. W. N. Looman. 1986. Weighted averaging, logistic regression and the  
642 Gaussian response model. *Vegetatio* **65**:3–11.
- 643 ter Braak, C. J. F., A. Cormont, and S. Dray. 2012. Improved testing of species traits-  
644 environment relationships in the fourth-corner problem. *Ecology* **93**:1525–1526.

645 Vile, D., B. Shipley, and E. Garnier. 2006. Ecosystem productivity can be predicted from  
646 potential relative growth rate and species abundance. *Ecology Letters* **9**:1061–1067.

647 Whittaker, R.H. 1952. A study of summer foliage insect communities in the Great Smoky  
648 Mountains. *Ecological Monographs* **22**:1–44.

649 Zelený, D., and A. P. Schaffers. 2012. Too good to be true: pitfalls of using mean Ellenberg  
650 indicator values in vegetation analyses. *Journal of Vegetation Science* **23**:419–431.

651

## 652 **Supplemental materials**

653 **Appendix S1.** Description of an algorithm generating simulated community data along two  
654 environmental gradients (*2D simulated community dataset*).

655 **Appendix S2.** Weighted-mean approach applied to 2D simulated community data sets:  
656 additional results.

657 **Appendix S3.** The dissimilarity index between two CWM values and the beta diversity measure.

658 **Appendix S4.** Evaluation of permutation tests using 1D simulated data from Dray and Legendre  
659 (2008).

660 **Data S1.** R-code for all analyses.

661 **Data S2.** Source code for the R library *weimea*, version v. 0.62 (actual version can be found on  
662 <https://github.com/zdealveindy/weimea/>).

663

664 *Table 1*

665 Overview of the characteristics for the three categories of hypotheses tested by the *weighted-*  
 666 *mean* approach. For each category, the corresponding assumption about a link between sample  
 667 attributes (**R**) or species attributes (**Q**) and species composition (**L**) is provided, as well as the  
 668 null vs alternative hypothesis, a scenario within the simulated data relevant in the context of a  
 669 given category (see Fig. 1), and the recommended test (standard: standard parametric or  
 670 permutation test; modified: modified permutation test; sequential with 4c: the sequential  
 671 permutation test with the fourth-corner statistic).

| Category of hypotheses        |                           | A                         | B                         | C                                                                                                 |
|-------------------------------|---------------------------|---------------------------|---------------------------|---------------------------------------------------------------------------------------------------|
| <b>Assumption</b>             |                           | sample attributes fixed   | species attributes fixed  | no assumptions                                                                                    |
| <b>Null hypothesis</b>        |                           | $Q \not\leftrightarrow L$ | $R \not\leftrightarrow L$ | $R \not\leftrightarrow Q$ ,<br>i.e. $R \not\leftrightarrow L$ and/or<br>$Q \not\leftrightarrow L$ |
| <b>Alternative hypothesis</b> |                           | $Q \leftrightarrow L$     | $R \leftrightarrow L$     | $R \leftrightarrow Q$ ,<br>i.e. $R \leftrightarrow L$ and<br>$Q \leftrightarrow L$                |
| <b>Relevant scenario(s)</b>   |                           | Scenario 2                | Scenario 3                | Scenarios 2, 3 and 4                                                                              |
| <b>Recommended test</b>       | <b>standard</b>           | no (biased result)        | yes                       | no (biased result)                                                                                |
|                               | <b>modified</b>           | yes                       | no*                       | no*                                                                                               |
|                               | <b>sequential with 4c</b> | yes                       | yes (but not needed)      | yes**                                                                                             |

672 \* species attributes in Scenario 3 are fixed and should not be permuted

673 \*\* but too conservative if the beta diversity of the species composition matrix is low

674  $\not\leftrightarrow$  - no link between the two matrices,  $\leftrightarrow$  - link between the two matrices.



675 **Figure captions**

676 **Figure 1.** Conceptual differences between scenarios 1–4 in the weighted-mean approach. In  
677 scenario 1, both sample attributes (**R**) and species attributes (**Q**) are fixed, linked to matrix of  
678 species composition (**L**), while in the other three scenarios one or both attributes are considered  
679 random, without the link to species composition. In the simulated data example, the link of  
680 attributes to species composition is cancelled by permuting the values of species attributes  
681 (scenario 2), sample attributes (scenario 3) or both (scenario 4). In the schema, the matrix of  
682 species attributes is transposed (**Q'**) to match the dimension of the matrix of species composition  
683 (**L**).

684 **Figure 2.** Pearson's  $r$  correlation coefficients among CWM and sample attributes for each of the  
685 four scenarios and ten levels of beta diversity (1000 correlations for each combination have been  
686 conducted). Grey horizontal bars are outliers.

687 **Figure 3.** Proportion of significant correlations ( $P < 0.05$ ) between CWM and sample attributes,  
688 tested by standard parametric  $t$ -test. For each of the four scenarios and ten levels of beta diversity,  
689 1000 tests have been conducted.

690 **Figure 4.** Proportion of significant correlations ( $P < 0.05$ ) between CWM and sample attributes,  
691 tested by modified permutation test (white bars) and sequential test with fourth-corner  $r$  statistic  
692 (grey bars). For each of the four scenarios and ten levels of beta diversity, 1000 tests have been  
693 conducted for each method.

694

695 *Figure 1*

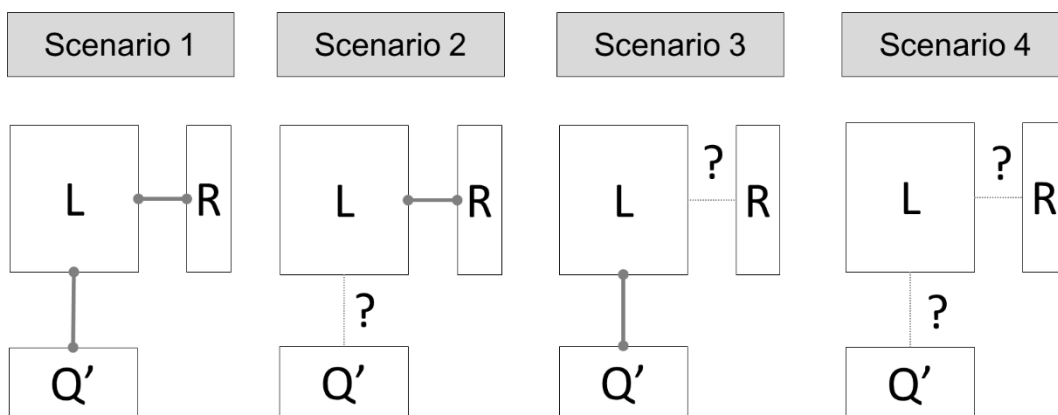

696  
697

698 *Figure 2*

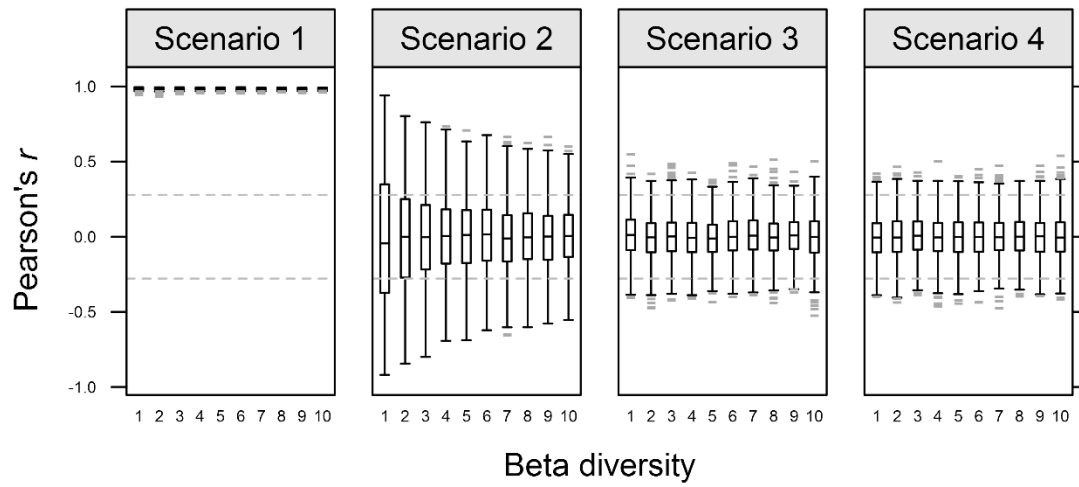

699

700

701 *Figure 3*

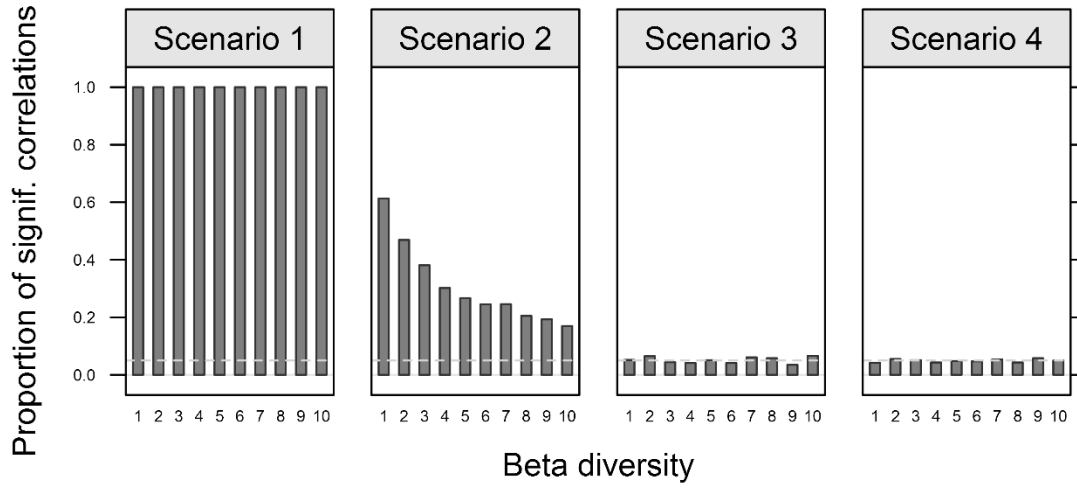

702

703

704 *Figure 4*

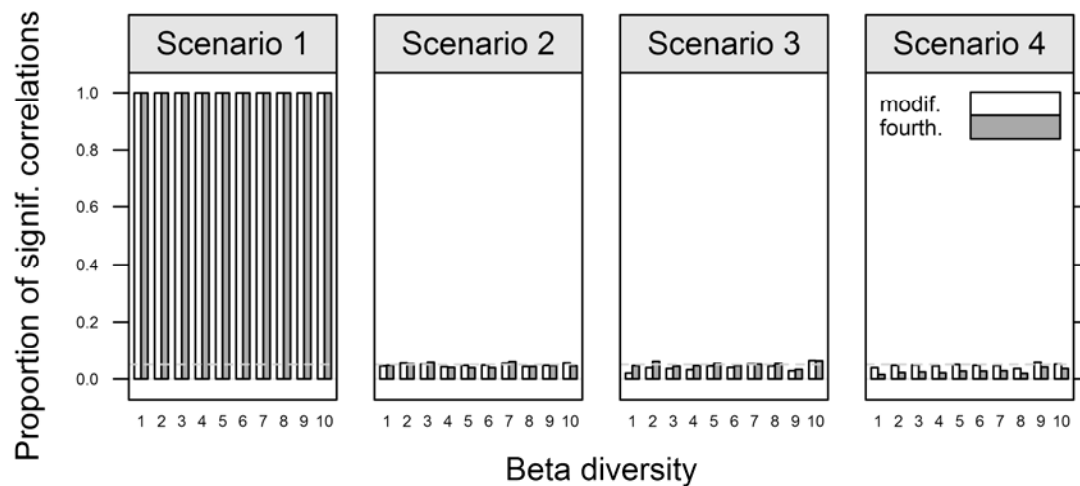

705
